# Supplementary material for: The Lateral Preoptic Area and Its Projection to the VTA Regulate VTA Activity and Drive Complex Reward Behaviors
Source: Front Syst Neurosci. 2020 Nov 3;14:581830. doi: 10.3389/fnsys.2020.581830 (PMC7669548; doi:10.3389/fnsys.2020.581830)
Supplement: Supplementary file 1 [file Table_1.xlsx]

## Sheet: Inventory (paper)
Use	Name	Company	City	State	catalog #	link to specific item
Rat chow	Rat Laboratory Chow	LabDiet	St. Louis	MO	5053	https://www.labdiet.com/cs/groups/lolweb/@labdiet/documents/web_content/mdrf/mdi4/~edisp/ducm04_028436.pdf
Chemical	Isoflurane	Henry Schein	Dublin	OH	1169567762	https://www.pattersonvet.com/ProductItem/078931389?omni=14043070406
Chemical	0.9% Saline	Henry Schein	Dublin	OH	2477	https://northamerica.covetrus.com/Product?sku=069169
Chemical	Flunixin Meglumine	Henry Schein	Dublin	OH	49622	https://northamerica.covetrus.com/Product?sku=049622
Chemical	Cefazolin	Henry Schein	Dublin	OH	1026761	https://www.henryschein.com/us-en/medical/p/pharmacy/rx/cefazolin-sodium-inj-sdv-10ml/1026761
Chemical	Phosphate Buffered Saline	Sigma Aldrich	St. Louis	MO	P3813	https://www.sigmaaldrich.com/catalog/product/sigma/p3813?lang=en&region=US
Chemical	Sucrose	Sigma Aldrich	St. Louis	MO	S7903	https://www.sigmaaldrich.com/catalog/product/sigma/s7903?lang=en&region=US
Chemical	Paraformaldehyde	Sigma Aldrich	St. Louis	MO	158127	https://www.sigmaaldrich.com/catalog/product/sial/158127?lang=en&region=US
Chemical	Fast green	Sigma Aldrich	St. Louis	MO	F7252	https://www.sigmaaldrich.com/catalog/search?term=F7252&interface=All&N=0&mode=match%20partialmax&lang=en&region=US&focus=product
Chemical	Betadine	Purdue Products L.P.	Stamford	CT	67618-155-32	https://www.medline.com/product/Betadine-Solution-by-Purdue-Products-LP/Z05-PF41983
Chemical	Magnium- and calcium-free PBS	Thermo Fisher Scientific	Waltham	MA	10010023	https://www.thermofisher.com/order/catalog/product/10010023#/10010023
Chemical	2% Mepivacaine	TCI America	Portland	OR	M2560	https://www.tcichemicals.com/eshop/en/be/commodity/M2560/index.html
Chemical	2-methylbutane	Sigma Aldrich	St. Louis	MO	M32631	https://www.sigmaaldrich.com/catalog/product/sigald/m32631?lang=en&region=US
Vectors	AAV5/hSyn-ChR2(E123A)-eYFP (titer: 3.7e12 or 5.3e12)	UNC Viral Vector Core	Chapel Hill	NC	AV5/hSyn-ChR2(E123A)-eYFP	https://www.med.unc.edu/genetherapy/vectorcore/
Vectors	rAAV5/EF1a-DIO-hChR2/(H134R)-eYFP (titer 5e12)	UNC Viral Vector Core	Chapel Hill	NC	rAAV5/EF1a-DIO-hChR2/(H134R)-eYFP	https://www.med.unc.edu/genetherapy/vectorcore/
Vectors	AAV5/hsyn-eNpHR3.0-eYFP (titer: 5e12)	UNC Viral Vector Core	Chapel Hill	NC	AAV5/hsyn-eNpHR3.0-eYFP	https://www.med.unc.edu/genetherapy/vectorcore/
Vectors	rAAV5_hSyn-GCaMP6f (titer: 5.43e12)	UNC Viral Vector Core	Chapel Hill	NC	rAAV5_hSyn-GCaMP6f	https://www.med.unc.edu/genetherapy/vectorcore/
Vectors	AAV5/hSyn-mCherry (titer: 4.8e12, or 2.5e12)	UNC Viral Vector Core	Chapel Hill	NC	AAV5/hSyn-mCherry (titer: 4.8e12, or 2.5e12)	https://www.med.unc.edu/genetherapy/vectorcore/
Vectors	CAV-2 Cre (promoter: CMV + SV40 polyA tail; titer: 1.25e13)	Institut de Génétique Moléculaire de Montpellier	Montpellier	France	CAV-2 Cre (promoter: CMV + SV40 polyA tail)	https://www.pvm.cnrs.fr/plateau-igmm/?vector=cav-cre
Surgery	Induction Chamber	E-Z Anesthesia	Palmer	PA	EZ-178	https://www.ezsystemsinc.com/product/ez-178-sure-seal-mouse-rat-chamber-9%e2%80%b3l-x-4%e2%80%b3w-x-4%e2%80%b3h/
Surgery	Stereotaxic Apparatus	David Kopf Instruments	Tujunga	CA	902	https://kopfinstruments.com/search/902
Surgery	Stereotaxic Breather	E-Z Anesthesia	Palmer	PA	EZ-107A	https://www.ezsystemsinc.com/product/ez-107a-rat-stereotaxic-breather/
Surgery	Vaporizer	E-Z Anesthesia	Palmer	PA	EZ-155	https://www.ezsystemsinc.com/product/ez-155-stand-alone-vaporizer/
Surgery	Warming pad + Controller, Rectal Probe, Disposable protectors	Kent Scientific	Torrington	CT	RT-0515	https://www.kentscientific.com/products/far-infrared-warming-pads-with-controller/
Surgery	Clippers	Andis Company	Sturtevant	WI	22350	https://small-animal.andis.com/product/agc%26reg%3B-1-speed-detachable-blade-clipper/?item-no=22350
Surgery	Surgical Staples	Braintree Scientific, Inc	Braintree	MA	ACS APL, EZC CS	https://www.braintreesci.com/prodinfo.asp?number=EZC
Surgery	Antibiotic Ointment	Medique Products	Fort Myers	FL	22373	https://mediqueproducts.com/Catalog/Medi-First/ointments.html
Surgery	Metabond Epoxy Layer	Parkell Inc.	Edgewood	NY	S380	http://www.parkell.com/c-b-metabond_3
Surgery	Dental Cement Epoxy Layer	Coltene/Whaledent Inc.	Cuyahoga Falls	OH	H00325	https://www.pattersondental.com/Supplies/ItemDetail/073798006
Surgery	Dremel 3000	Dremel	Racine	WI	3000	https://www.dremel.com/en_US/products/-/show-product/tools/3000-variable-speed-rotary-tool
Extracellular electrophysiology recording	Glass Pipette	WPI	Sarasota	FL	1B150F-4	https://www.wpi-europe.com/products/glass/glass-capillaries.aspx#productlistitem3715
Extracellular electrophysiology recording	Vertical Puller	Narishige	Amityville	NY	PE-2	http://products.narishige-group.com/group1/PE-22/pipette/english.html
Extracellular electrophysiology recording	Micro Electrode Impedance meter	Winston Electronics	St. Louis	MO	BL1000-B	N/A (this model is no longer produced)
Extracellular electrophysiology recording	Light-Curing Epoxy	3M	Maplewood	MN	3920A1B	https://mvpdentalsupply.com/products/3m-espe-3920a1b-filtek-supreme-ultimate-syr-b-a1
Extracellular electrophysiology recording	Nanoject II	Drummond Scientific Company	Broomall	PA	3-000-204	https://www.drummondsci.com/products/microinjection/nanoject-ii-auto-nanoliter-injector/
Extracellular electrophysiology recording	5 uL Syringe	Hamilton	Reno	NV	87943	https://www.hamiltoncompany.com/laboratory-products/syringes/general-syringes/microliter-syringes/600-series
Extracellular electrophysiology recording	Microinjection Pump	Harvard Apparatus	Holliston	MA	70-4506	https://www.harvardapparatus.com/standard-infuse-withdraw-pump-11-pico-plus-elite-programmable-syringe-pump.html
Extracellular electrophysiology recording	Fiber Optic Rotary Joint	Doric Lenses Inc.	Quebec	Canada	FRJ_1x1_FC-FC	http://doriclenses.com/life-sciences/fiber-optic-rotary-joints/808-1x1-fiber-optic-rotary-joints-.html
Extracellular electrophysiology recording	8mm 200μm 0.39NA Fiber	Thorlabs	Newton	NJ	FT200UMT	https://www.thorlabs.com/thorproduct.cfm?partnumber=FT200UMT
Extracellular electrophysiology recording	1.25mm stainless steel ferrule	Thorlabs	Newton	NJ	SF440	https://www.thorlabs.com/newgrouppage9.cfm?objectgroup_id=6313
Extracellular electrophysiology recording	2.5mm zirconia sleeve	Senko Advanced Components, Inc.	Marlborough	MA	ZRS-25-114	https://www.senko.com/fiberoptic/pdf/InterconnectCatalogue_pg47.pdf
Extracellular electrophysiology recording	8mm 400μm 0.48NA Fiber attached to a 2.5mm Stainless Steel Ferrule	Doric Lenses Inc	Quebec	Canada	MFC_400/430-0.48_8mm_FLT	http://doriclenses.com/life-sciences/fiber-optic-cannulas/824-mono-fiber-optic-cannulas.html#/termination_code_cannulas-flt/receptacle_cannulas-mf1_25/fiber_optic_code_cannulas-400_430_0_48
Extracellular electrophysiology recording	450nm Laser Diode	Doric Lenses Inc	Quebec	Canada	LDFLS_450/075	http://doriclenses.com/life-sciences/laser-diode-fiber-light-sources/903-laser-diode-fiber-light-source-1-channel-model.html#/ld_wavelengths-450_nm_75_mw
Extracellular electrophysiology recording	520nm Laser Diode	Doric Lenses Inc	Quebec	Canada	LDFLS_520/060	http://doriclenses.com/life-sciences/laser-diode-fiber-light-sources/903-laser-diode-fiber-light-source-1-channel-model.html#/ld_wavelengths-520_nm_60_mw
Extracellular electrophysiology recording	473nm diode-pumped solid state laser (DPSS)	Laser Glow	Toronto	Ontario	LD-WL206	https://www.laserglow.com/product/bywavelength/473/
Extracellular electrophysiology recording	Pulse Train Generator	Prizmatix	Givat-Shmuel	Israel	Pulser	https://www.prizmatix.com/Optogenetics/PulserPlus.htm
Extracellular electrophysiology recording	Hydrolic Microdrive	David Kopf Instruments	Tujunga	CA	640	N/A (this model is no longer produced)
Extracellular electrophysiology recording	50/60Hz hum bug noise eliminator	Quest Scientific	North Vancouver	BC	Hum Bug	http://www.quest-sci.com/QuestScientific0.html
Extracellular electrophysiology recording	AxoScope Digitizer	Molecular Devices	San Jose	CA	Digidata 1440A	https://www.moleculardevices.com/sites/default/files/en/assets/brochures/dd/cns/axon-guide-to-electrophysiology-and-biophysics-laboratory-techniques.pdf
Extracellular electrophysiology recording	Oscilloscope	EZ Digital	Gwang-Ju City	South Korea	OS-5020A	http://ezdigital.co.kr/a/productSearchView.php?board_data=aWR4PTQmXyZzdGFydFBhZ2U9MCZfJmxpc3RObz0y||&search_items=dG90YWxzZWFyY2g9T1MtNTAyMEE=||
Extracellular electrophysiology recording	Audio Monitor	Grass Technologies	West Warwick	RI	AM10	N/A (this model is no longer produced)
Extracellular electrophysiology recording	Current generator	Fintronics Inc.	Orange	CT	VL-1200-D	N/A (this model is no longer produced)
Extracellular electrophysiology recording	1m metal sheathed 400μm 0.48NA patch cord + filter cube	Doric Lenses Inc	Quebec	Canada	B340-1149	http://www.doriclenses.com/downloads/Product_catalog_RELEASE_WEB.pdf
Extracellular electrophysiology recording	Blue 465nm LED	Doric Lenses Inc	Quebec	Canada	LEDC1-B_FC	http://www.doriclenses.com/downloads/Product_catalog_RELEASE_WEB.pdf
Extracellular electrophysiology recording	Violet 405nm LED	Doric Lenses Inc	Quebec	Canada	LEDC1-405_FC	http://www.doriclenses.com/downloads/Product_catalog_RELEASE_WEB.pdf
Extracellular electrophysiology recording	Newport Femtowat Detectors	Doric Lenses Inc	Quebec	Canada	D490-1003	http://www.doriclenses.com/downloads/Product_catalog_RELEASE_WEB.pdf
Extracellular electrophysiology recording	Fiber Photometry Console	Doric Lenses Inc	Quebec	Canada	D460-2002	http://www.doriclenses.com/downloads/Product_catalog_RELEASE_WEB.pdf
Behavior	Individual IR Source / Detector (locomotion)	Med Associates	Fairfax	VT	ENV-253SD	https://www.med-associates.com/product/individual-ir-source-and-detector/
Behavior	Nose Holes	Med Associates	Fairfax	VT	ENV-114BM	https://www.med-associates.com/product/illuminated-nose-poke-response-for-rat/
Behavior	Locomotion Infrared Beam Detectors	Med Associates	Fairfax	VT	ENV-253SD	https://www.med-associates.com/product/individual-ir-source-and-detector/
Behavior	Operant conditioning chamber (xtra-wide)	Med Associates	Fairfax	VT	CT-ENV-007-VP-X	https://www.med-associates.com/product/value-pak-extra-tall-modular-test-chamber/
Behavior	Sucrose pellets, 45mg	Bioserv	Flemington	NJ	F06233 (later changed to F0299)	https://www.bio-serv.com/product/DPP_RP.html
Behavior	Fear conditioning chamber	Ugo Basile	Gemonio	Italy	46002	https://www.ugobasile.com/products/catalogue/behaviour-conditioning-reward/fear-conditioning-system-anymaze
Histology	Optimal Cutting Temperature (OCT) Compound	Thermo Fisher Scientific	Waltham	MA	23-730-571	https://www.fishersci.com/shop/products/fisher-healthcare-tissue-plus-o-c-t-compound-clear/23730571
Histology	RNaseZap	Thermo Fisher Scientific	Waltham	MA	AM9780	https://www.thermofisher.com/order/catalog/product/AM9780#/AM9780
Histology	Cryostat	Thermo Fisher Scientific	Waltham	MA	HM550	https://assets.thermofisher.com/TFS-Assets/APD/manuals/HM550%20Cryostat%20388114.pdf
Histology	Superfrost Plus Slide	Fisher Scientific	Pittsburgh	PA	12-550-15	https://www.fishersci.ca/shop/products/fisherbrand-superfrost-plus-microscope-slides-2/1255015
Histology	RNAscope Fluorescent Multiplex Detection Reagents	Advanced Cell Diagnostics, Inc	Hayward	CA	320851	https://acdbio.com/store/catalog/product/view/id/10/
Histology	Simport Scientific EasyDip Slide Staining Jars	Fisher Scientific	Pittsburgh	PA	22-038-495	https://www.fishersci.com/shop/products/simport-scientific-easydip-slide-staining-system-7/p-2682996
Histology	DAPI Fluoromount-G	SouthernBiotech	Birmingham	AL	0100-20	https://www.southernbiotech.com/?catno=0100-20&type=Other#&panel1-1&panel2-1
Histology	EGFP Target Probe	Advanced Cell Diagnostics, Inc	Hayward	CA	400281	https://acdbio.com/search/site/%252A400281%252A/cms/probes/channel/1
Histology	Rn-Slc17a6-C2 Target Probe	Advanced Cell Diagnostics, Inc	Hayward	CA	317011-C2	https://acdbio.com/search/site/%252A317011-C2%252A/cms/probes
Histology	Rn-Gad1-C3 Target Probe	Advanced Cell Diagnostics, Inc	Hayward	CA	316401-C3	https://acdbio.com/search/site/%252A316401-C3%252A/cms/probes
Microscopy	Nikon A1R Confocal Microscope	Nikon	Melville	NY	MHA50100 & MEA54000	https://www.nikon.com/products/microscope-solutions/lineup/confocal/a1/index.htm
Microscopy	Fluorescent Steromicroscope	Carl Zeiss	Oberkochen	Germany	Axio Zoom.V16	https://www.zeiss.com/microscopy/us/products/stereo-zoom-microscopes/axio-zoom-v16.html
Software/Programs	Doric Neuroscience Studio	Doric Lenses Inc	Quebec	Canada	Version 5.2.2.3	http://doriclenses.com/life-sciences/software/955-doric-neuroscience-studio.html
Software/Programs	Ethovision XT	Noldus Information Technology	Wageningen	Netherlands	Version 10.0.828	https://www.noldus.com/ethovision-xt
Software/Programs	Axoscope	Molecular Devices	San Jose	CA	Version 10.7	http://mdc.custhelp.com/app/answers/detail/a_id/18779/~/axon%E2%84%A2pclamp%E2%84%A2-10-electrophysiology-data-acquisition-%26-analysis-software-download
Software/Programs	Image J	National Institutes of Health (NIH)	Bethesda	MD	Version 1.51w 13	https://imagej.nih.gov/ij/
Software/Programs	MATLAB	MathWorks	Natick	MA	Version R2018a	https://www.mathworks.com/products/new_products/release2018a.html
Software/Programs	Adobe Illustrator CC	Adobe, Inc.	San Jose	CA	Version 22.1	http://allpcworld.com/download-adobe-illustrator-cc-2018-22-1-free/
Software/Programs	MED PC IV	Med Associates	Fairfax	VT	SOF-735	https://www.med-associates.com/customer-portal/current-software-versions/
Software/Programs	GraphPad Prism	GraphPad	San Diego	CA	Version 8.2.0	https://www.graphpad.com/scientific-software/prism/
Software/Programs	ggplot2	RStudio, Inc.	Boston	MA	Version 3.0.0	https://ggplot2.tidyverse.org/
Software/Programs	afex package	Github	San Francisco	CA	Version 0.21-2	https://github.com/cran/afex/tree/master/R
Software/Programs	R Program	R Foundation for Statistical Computing	Vienna	Austria	Version 3.5.2	http://www.R-project.org/
Software/Programs	R Studio	RStudio, Inc.	Boston	MA	Version 1.2.1335-1	https://rstudio.com/products/rstudio/download/

## Sheet: Inv (not listed paper but used)
Use	Name	Company	City	State	catalog #	link to specific item
Extracellular electrophysiology recording	Injection pipette	Ringcaps			9600122	https://www.fishersci.de/shop/products/glass-capillary-pipet-3/15529035
Behavior	Pellet Dispenser (Modular) for Rat – 45 mg	Med Associates	Fairfax	VT	ENV-203M-45	https://www.med-associates.com/product/modular-pellet-dispenser-for-rat-45mg/
Behavior	Pellet Receptacle (Trough) w/Extra Tall Opening	Med Associates	Fairfax	VT	ENV-200R2M-6.0	https://www.med-associates.com/product/pellet-receptacle-trough-type-with-extra-tall-6-opening/
Behavior	Pellet Receptacle (Trough)	Med Associates	Fairfax	VT	ENV-200R2M	https://www.med-associates.com/product/pellet-receptacle-trough-type/
Behavior	Grid Floor 16" L with 25 Grid Rods	Med Associates	Fairfax	VT	CT-ENV-005-X10	https://www.med-associates.com/
Behavior	Extra Wide MDF SAC	Med Associates	Fairfax	VT	ENV-016MD	https://www.med-associates.com/product/extra-wide-mdf-cubicle-3/
Behavior	House Light, Hooded, 100 ma, 28 V DC	Med Associates	Fairfax	VT	ENV-215M	https://www.med-associates.com/product/house-light-for-rat/
Behavior	4 Channel IR Controller	Med Associates	Fairfax	VT	ENV-253	https://www.med-associates.com/product/4-channel-ir-controller-11/
Behavior	SmartCtrl 8 Input, / 16 Output Package	Med Associates	Fairfax	VT	DIG-716P2	https://www.med-associates.com/product/smartctrl-8-input16-output-package/
Behavior	Large Tabletop Cabinet and Power Supply 120V 60 Hz	Med Associates	Fairfax	VT	SG-6510DA	https://www.med-associates.com/product/large-tabletop-cabinet-and-power-supply-230v-50-hz/
Behavior	PCI Interface Package	Med Associates	Fairfax	VT	DIG-700P2-R2	https://www.med-associates.com/
Behavior	Blank Panel, 3/8 (4-7/8" - 12.4 cm)	Med Associates	Fairfax	VT	ENV-007-38P	https://www.med-associates.com/
Behavior	Blank Panel, 1/4 (3 1/4" - 8/25 cm)	Med Associates	Fairfax	VT	ENV-007-4P	https://www.med-associates.com/
Behavior	Tabletop Interface Cabinet, 120 V 60 Hz	Med Associates	Fairfax	VT	SG-6080C	https://www.med-associates.com/product/tabletop-interface-cabinet-120v-60-hz/
Behavior	Shock Output Cable, DB-9/DB-9, 10'	Med Associates	Fairfax	VT	SG-219G-10	https://www.med-associates.com/
Behavior	10' (3.0 m) 3-Pin Mini-Molex Extension Cable	Med Associates	Fairfax	VT	SG-216A-10	https://www.med-associates.com/
Behavior	Grid Rod Harness for 32 Rat Grid Rods (not sure)	Med Associates	Fairfax	VT	CT-ENV-408R-X6	https://www.med-associates.com/
Behavior	Grid Floor 16" L with 32 Grid Rods Dwg (not sure)	Med Associates	Fairfax	VT	CT-ENV-005-X8	https://www.med-associates.com/
Surgery	Stanfield Heat Mat - 12" x 36 "	Osborne Industries	Holdenville	Oklahoma	250220	https://www.qcsupply.com/250220-stanfield-heat-mat-12-36.html
